# Supplementary material
Source: PubMed Central journal article supplement (PMC5530733)
Supplement: NIHMS871443-supplement-1.pdf [file NIHMS871443-supplement-1.pdf]

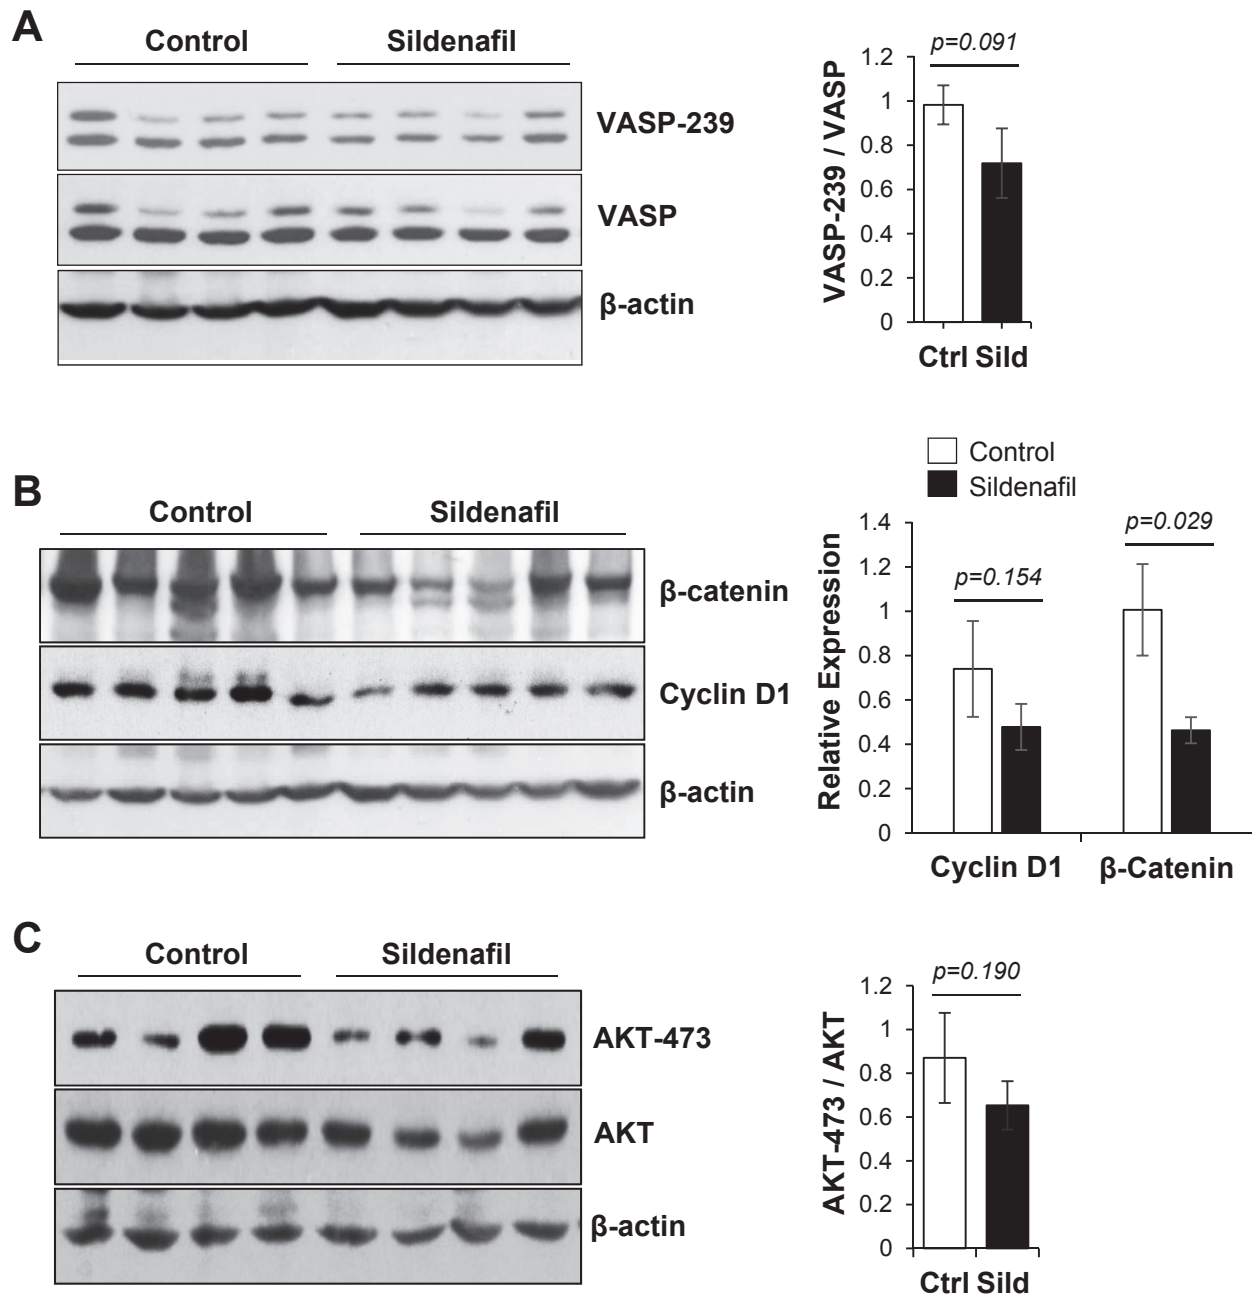

**Figure S1. The effect of Sildenafil on cGMP effector pathways in AOM/DSS polyps.** Western blotting was used to determine the expression of signaling pathway components in polyps from control and sildenafil treated mice. **A**, Phospho-VASP, total VASP as loading control; **B**,  $\beta$ -catenin and cyclin D1,  $\beta$ -actin as loading control; **C**, Phospho-AKT, total AKT as loading control (left panels). The right panels show quantitation of blot densitometry.

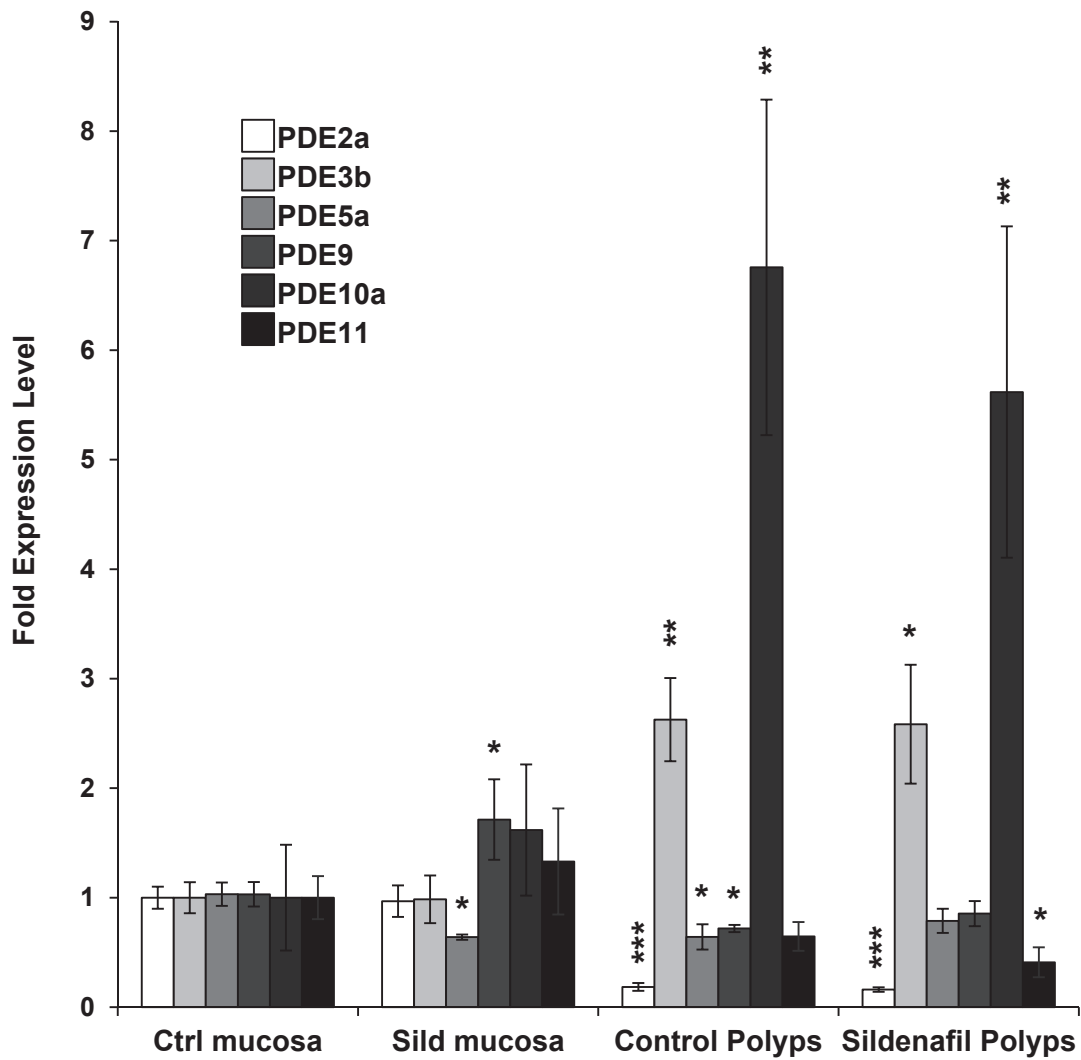

**Figure S2. The mRNA expression of phosphodiesterase isoforms in AOM/DSS polyps.** Real time qPCR analysis depicting the relative expression of PDE isoforms in polyps from control and sildenafil treated mice ( $n > 5$  per group). Asterisks, \* $p < 0.05$ , \*\* $p < 0.01$ , \*\*\* $p < 0.001$ .
